# Supplementary material for: The prognostic value of lactate dehydrogenase/albumin ratio in extranodal natural killer/T cell lymphoma
Source: Research Square preprint supplement (doi:10.21203/rs.3.rs-5503269/v1), 2025-04-07
Supplement: Supplementary file 1 [file 2f25e739767176edbab40e31.docx]

Supplementary table 4. Multivariate analysis of overall survival according to LAR for patients with EBV-DNA data

| Characteristics | Relative risk (95% CI), p value |
| --- | --- |
| Age (＞60 years) |  |
| Gender (male) |  |
| ECOG PS (≥2) |  |
| Presence of B symptoms |  |
| Ann Arbor stage (III-IV) |  |
| BM invasion |  |
| RLN invasion |  |
| DLN invasion |  |
| Primary locations (non-nasal type) |  |
| Extranodal sites≥2 |  |
| Response after treatment (non-CR) | 1.693 (1.473-1.945), ＜0.001 |
| LAR (＞5.4) | 1.945 (1.239-3.052), 0.004 |
| Detectable EBV-DNA titers | 2.450 (1.192-5.036), 0.015 |

ECOG PS, Eastern Cooperative Oncology Group performance status; BM, bone marrow; RLN, reginal lymph node; DLN, distant lymph node; CR, complete remission; LAR, lactate dehydrogenase to albumin ratio; EBV, Epstein-Barr virus; CI, confidence interval
