# Supplementary material for: The prognostic value of lactate dehydrogenase/albumin ratio in extranodal natural killer/T cell lymphoma
Source: Research Square preprint supplement (doi:10.21203/rs.3.rs-5503269/v1), 2025-04-07
Supplement: Supplementary file 2 [file 4088087776db5912c031155d.docx]

Supplementary table 3. Multivariate analysis of overall survival according to LDH and ALB for patients with EBV-DNA data

| Characteristics | Relative risk (95% CI), p value |
| --- | --- |
| Age (＞60 years) |  |
| Gender (male) |  |
| ECOG PS (≥2) |  |
| Presence of B symptoms |  |
| Ann Arbor stage (III-IV) |  |
| BM invasion |  |
| RLN invasion |  |
| DLN invasion |  |
| Primary locations (non-nasal type) |  |
| Extranodal sites≥2 |  |
| Response after treatment (non-CR) | 1.609(1.397-1.853), ＜0.001 |
| ALB(＜40 g/L) | 2.043(1.313-3.180), 0.002 |
| LDH(＞230 u/L) | 1.647(1.067-2.542), 0.024 |
| Detectable EBV-DNA titers | 2.249(1.088-4.648), 0.029 |

ECOG PS, Eastern Cooperative Oncology Group performance status; BM, bone marrow; RLN, reginal lymph node; DLN, distant lymph node; CR, complete remission; ALB, albumin; LDH, lactate dehydrogenase; EBV, Epstein-Barr virus; CI, confidence interval
