# Supplementary material for: The prognostic value of lactate dehydrogenase/albumin ratio in extranodal natural killer/T cell lymphoma
Source: Research Square preprint supplement (doi:10.21203/rs.3.rs-5503269/v1), 2025-04-07
Supplement: Supplementary file 3 [file 58f181a33c5d9d1534c56459.docx]

Supplementary table 5. Multivariate analysis of overall survival according to LAR-associated prognostic score for patients with EBV-DNA data

| Characteristics | Relative risk (95% CI), p value |
| --- | --- |
| Age (＞60 years) |  |
| Gender (male) |  |
| ECOG PS (≥2) |  |
| Presence of B symptoms |  |
| Ann Arbor stage (III-IV) |  |
| BM invasion |  |
| RLN invasion |  |
| DLN invasion |  |
| Primary locations (non-nasal type) |  |
| Extranodal sites≥2 |  |
| Response after treatment (non-CR) | 1.621 (1.409-1.864), ＜0.001 |
| LAR-associated prognostic score | 1.832 (1.384-2.424), ＜0.001 |
| Detectable EBV-DNA titers | 2.216 (1.074-4.575), 0.031 |

ECOG PS, Eastern Cooperative Oncology Group performance status; BM, bone marrow; RLN, reginal lymph node; DLN, distant lymph node; CR, complete remission; LAR, lactate dehydrogenase to albumin ratio; EBV, Epstein-Barr virus; CI, confidence interval
