# Supplementary material for: The prognostic value of lactate dehydrogenase/albumin ratio in extranodal natural killer/T cell lymphoma
Source: Research Square preprint supplement (doi:10.21203/rs.3.rs-5503269/v1), 2025-04-07
Supplement: Supplementary file 4 [file 7c90985b93587168b598d690.docx]

Supplementary table 1. Risk groups categorized by the LAR-associated prognostic score

| Risk Group | LDH level | ALB level |
| --- | --- | --- |
| Low risk | Normal | Normal |
| intermediate risk | High or Normal | Low or Normal |
| high risk | High | Low |

LDH, lactate dehydrogenase; ALB, albumin
