# Supplementary material for: The prognostic value of lactate dehydrogenase/albumin ratio in extranodal natural killer/T cell lymphoma
Source: Research Square preprint supplement (doi:10.21203/rs.3.rs-5503269/v1), 2025-04-07
Supplement: Supplementary file 5 [file a339b1bf15056f8678237fef.docx]

Supplementary table 2. Univariate analysis of overall survival for patients with EBV-DNA data

| Characteristics | p value |
| --- | --- |
| Age (＞60 years) | 0.18 |
| Gender (male) | 0.245 |
| ECOG PS (≥2) | ＜0.001 |
| Presence of B symptoms | 0.003 |
| Ann Arbor stage (III-IV) | ＜0.001 |
| BM invasion | ＜0.001 |
| RLN invasion | ＜0.001 |
| DLN invasion | ＜0.001 |
| Primary locations (non-nasal type) | ＜0.001 |
| Extranodal sites≥2 | ＜0.001 |
| Response after treatment (non-CR) | ＜0.001 |
| PINK-E score (≥2) | ＜0.001 |
| ALB(＜40 g/L) | ＜0.001 |
| LDH(＞230 u/L) | ＜0.001 |
| LAR | ＜0.001 |
| LAR-associated prognostic score | ＜0.001 |
| Detectable EBV-DNA titers | ＜0.001 |

ECOG PS, Eastern Cooperative Oncology Group performance status; BM, bone marrow; RLN, reginal lymph node; DLN, distant lymph node; CR, complete remission; PINK-E prognostic model for natural killer lymphoma with Epstein-Barr virus; ALB, albumin; LDH, lactate dehydrogenase；LAR, lactate dehydrogenase to albumin ratio; EBV, Epstein-Barr virus
